# Supplementary material
Source: PubMed Central journal article supplement (PMC8974381)
Supplement: jcsm.9786.sm001.pdf [file jcsm.9786.sm001.pdf]

**Table S1.** Comparison of sleep parameters between the participants with and without mild cognitive impairment (MCI) in different sexes.

| Categorical variable            | Male (n = 38)    |               | P    | Female (n = 30)  |               | P    |
|---------------------------------|------------------|---------------|------|------------------|---------------|------|
|                                 | non-MCI (n = 31) | MCI (n = 18)  |      | non-MCI (n = 31) | MCI (n = 19)  |      |
| Sleep architecture              |                  |               |      |                  |               |      |
| Sleep efficiency (%)            | 72.96 ± 9.94     | 68.56 ± 18.39 | .57  | 70.83 ± 15.97    | 67.32 ± 22.24 | .93  |
| Wake (% of SPT)                 | 21.45 ± 10.57    | 26.84 ± 15.80 | .35  | 24.77 ± 13.97    | 27.10 ± 21.20 | .87  |
| NREM (% of SPT)                 | 70.81 ± 10.95    | 63.37 ± 14.77 | .14  | 66.57 ± 11.00    | 64.37 ± 17.98 | .83  |
| REM (% of SPT) #                | 7.75 ± 5.50      | 9.80 ± 5.13   | .3   | 8.70 ± 7.46      | 9.52 ± 5.18   | .78  |
| Oximetry parameter              |                  |               |      |                  |               |      |
| Mean SpO <sub>2</sub> (%)       | 95.19 ± 1.80     | 95.79 ± 1.57  | .36  | 95.83 ± 1.45     | 95.73 ± 1.29  | .64  |
| Minimum SpO <sub>2</sub> (%)    | 80.75 ± 7.95     | 83.78 ± 10.31 | .06  | 88.64 ± 3.78     | 86.79 ± 3.90  | .33  |
| ODI-3% (events/h)               | 30.71 ± 16.30    | 23.45 ± 19.13 | .2   | 10.53 ± 6.97     | 21.42 ± 13.83 | <.05 |
| Sleep disorder index (events/h) |                  |               |      |                  |               |      |
| AHI                             | 32.16 ± 16.98    | 24.72 ± 20.03 | .2   | 10.88 ± 7.29     | 21.01 ± 12.41 | <.05 |
| AI                              | 4.21 ± 4.32      | 8.30 ± 14.21  | .94  | 1.52 ± 2.13      | 3.92 ± 5.19   | .4   |
| AI <sub>NREM</sub>              | 3.86 ± 3.89      | 8.35 ± 14.67  | .99  | 0.98 ± 1.11      | 3.81 ± 5.74   | .35  |
| AI <sub>REM</sub> #             | 6.09 ± 12.48     | 8.14 ± 14.36  | .53  | 6.97 ± 11.61     | 4.29 ± 7.75   | 1    |
| HI                              | 27.95 ± 17.31    | 16.42 ± 15.73 | <.05 | 9.36 ± 6.25      | 17.09 ± 10.40 | <.05 |
| HI <sub>NREM</sub>              | 28.21 ± 18.04    | 16.22 ± 16.20 | <.05 | 8.26 ± 5.86      | 16.21 ± 10.66 | <.05 |
| HI <sub>REM</sub> #             | 23.68 ± 22.90    | 19.12 ± 20.32 | .41  | 21.69 ± 17.87    | 25.14 ± 18.01 | .58  |

SPT: sleep period of time; NREM: nonrapid eye movement; REM: rapid eye movement; SpO<sub>2</sub>: peripheral arterial oxygen saturation measured by pulse oximetry; ODI-3%: oxygen desaturation index ≥ 3%; AHI: apnea–hypopnea index; AI: apnea index; AI<sub>NREM</sub>: apnea index in the nonrapid eye movement stage; AI<sub>REM</sub>: apnea index in the rapid eye movement stage; HI: hypopnea index; HI<sub>NREM</sub>: hypopnea index in the nonrapid eye movement stage; HI<sub>REM</sub>: hypopnea index in the rapid eye movement stage.

# Two female participants with MCI did not have a REM stage during the polysomnography.

Data are expressed as mean ± standard deviation.

Differences between groups were assessed using the Mann–Whitney *U* test.

**Table S2.** Comparison of arousal indices between the participants with and without mild cognitive impairment (MCI) in different sexes.

| Arousal variable (events/h)       | Male (n = 38)    |               |          | Female (n = 30)  |               |          |
|-----------------------------------|------------------|---------------|----------|------------------|---------------|----------|
|                                   | non-MCI (n = 20) | MCI (n = 18)  | <i>P</i> | non-MCI (n = 11) | MCI (n = 19)  | <i>P</i> |
| ArI                               | 22.49 ± 10.75    | 27.08 ± 6.36  | <.05     | 16.21 ± 5.70     | 19.51 ± 11.31 | .67      |
| ArI <sub>NREM</sub>               | 22.44 ± 11.71    | 27.96 ± 8.28  | <.05     | 16.42 ± 6.16     | 20.07 ± 11.17 | .47      |
| ArI <sub>REM</sub> <sup>#</sup>   | 21.65 ± 19.44    | 22.77 ± 17.21 | .7       | 26.09 ± 34.87    | 16.99 ± 16.50 | .52      |
| SpArI                             | 6.99 ± 4.10      | 14.35 ± 8.45  | <.01     | 11.04 ± 4.07     | 9.65 ± 5.26   | .27      |
| SpArI <sub>NREM</sub>             | 7.03 ± 4.30      | 15.11 ± 9.57  | <.01     | 11.35 ± 4.22     | 9.96 ± 5.38   | .29      |
| SpArI <sub>REM</sub> <sup>#</sup> | 6.80 ± 7.72      | 10.02 ± 10.50 | .39      | 5.52 ± 6.17      | 10.34 ± 11.60 | .23      |
| RArI                              | 13.55 ± 10.3     | 10.57 ± 8.92  | .18      | 3.95 ± 2.78      | 8.49 ± 9.17   | .09      |
| RArI <sub>NREM</sub>              | 13.49 ± 10.93    | 10.57 ± 9.37  | .19      | 3.95 ± 2.79      | 8.69 ± 9.33   | .06      |
| RArI <sub>REM</sub> <sup>#</sup>  | 12.98 ± 14.48    | 11.81 ± 14.14 | .44      | 7.16 ± 13.28     | 6.07 ± 9.18   | .43      |
| SnArI                             | 0.43 ± 1.09      | 0.09 ± 0.24   | .31      | 0.05 ± 0.18      | 0.09 ± 0.37   | .97      |
| SnArI <sub>NREM</sub>             | 0.36 ± 0.95      | 0.09 ± 0.22   | .35      | 0.0 ± 0.0        | 0.10 ± 0.44   | .83      |
| SnArI <sub>REM</sub> <sup>#</sup> | 0.75 ± 2.33      | 0.08 ± 0.33   | .16      | 1.64 ± 5.43      | 0.09 ± 0.36   | .38      |
| LArI                              | 1.47 ± 1.53      | 2.03 ± 1.81   | .17      | 1.13 ± 1.12      | 1.16 ± 1.18   | 1.00     |
| LArI <sub>NREM</sub>              | 0.85 ± 1.44      | 0.72 ± 1.69   | .24      | 1.13 ± 1.18      | 1.23 ± 1.30   | .93      |
| LArI <sub>REM</sub> <sup>#</sup>  | 1.43 ± 1.39      | 1.89 ± 1.58   | .21      | 11.67 ± 35.98    | 0.44 ± 0.75   | .41      |

ArI: arousal index; ArI<sub>NREM</sub>: arousal index in the nonrapid eye movement stage; ArI<sub>REM</sub>: arousal index in the rapid eye movement stage; SpArI: spontaneous arousal index; SpArI<sub>NREM</sub>: spontaneous arousal index in the nonrapid eye movement stage; SpArI<sub>REM</sub>: spontaneous arousal index in the rapid eye movement stage; RArI: respiratory arousal index; RArI<sub>NREM</sub>: respiratory arousal index in the nonrapid eye movement stage; RArI<sub>REM</sub>: respiratory arousal index in the rapid eye movement stage; SnArI: snore arousal index; SnArI<sub>NREM</sub>: snore arousal index in the nonrapid eye movement stage; SnArI<sub>REM</sub>: snore arousal index in the rapid eye movement stage; LArI: limb movement arousal index; LArI<sub>NREM</sub>: limb movement arousal index in the nonrapid eye movement stage; LArI<sub>REM</sub>: limb movement arousal index in the rapid eye movement stage;

<sup>#</sup>Two female participants with MCI did not have a REM stage during the polysomnography.

Data are expressed as mean ± standard deviation.

Differences between groups were all assessed using the Mann–Whitney *U* test.

**Table S3.** Associations between sleep parameters and Cognitive Abilities Screening Instrument (CASI) score in different sexes.

| Categorical variable              | Male (n = 38)             |      | Female (n = 30)           |     |
|-----------------------------------|---------------------------|------|---------------------------|-----|
|                                   | Beta coefficient (95% CI) | P    | Beta coefficient (95% CI) | P   |
| Oximetry parameter                |                           |      |                           |     |
| Mean SpO <sub>2</sub> (%)         | 0.01 (−0.35 to 0.36)      | .98  | 0.25 (−0.17 to 0.66)      | .23 |
| Minimum SpO <sub>2</sub> (%)      | 0.41 (0.07 to 0.75)       | <.05 | 0.36 (−0.08 to 0.81)      | .11 |
| ODI-3% (events/h)                 | −0.36 (−0.69 to −0.03)    | <.05 | −0.19 (−0.60 to 0.21)     | .34 |
| Sleep disorder index (events/h)   |                           |      |                           |     |
| AHI                               | −0.37 (−0.7 to −0.05)     | <.05 | −0.19 (−0.60 to 0.22)     | .35 |
| AI                                | −0.22 (−0.55 to 0.11)     | .19  | −0.08 (−0.48 to 0.31)     | .67 |
| AI <sub>NREM</sub>                | −0.23 (−0.56 to 0.1)      | .17  | −0.15 (−0.60 to 0.23)     | .45 |
| AI <sub>REM</sub> <sup>#</sup>    | −0.1 (−0.44 to 0.24)      | .57  | 0.12 (−0.30 to 0.54)      | .57 |
| HI                                | −0.28 (−0.63 to 0.07)     | .12  | −0.19 (−0.61 to 0.23)     | .36 |
| HI <sub>NREM</sub>                | −0.27 (−0.62 to 0.08)     | .12  | −0.20 (−0.61 to 0.21)     | .33 |
| HI <sub>REM</sub> <sup>#</sup>    | −0.23 (−0.57 to 0.11)     | .18  | −0.07 (−0.56 to 0.42)     | .77 |
| Arousal variable (events/h)       |                           |      |                           |     |
| ArI                               | −0.34 (−0.69 to −0.01)    | .05  | 0.07 (−0.33 to 0.47)      | .72 |
| ArI <sub>NREM</sub>               | −0.33 (−0.68 to 0.02)     | .06  | 0.04 (−0.36 to 0.44)      | .85 |
| ArI <sub>REM</sub> <sup>#</sup>   | −0.21 (−0.55 to 0.13)     | .23  | 0.31 (−0.11 to 0.73)      | .14 |
| SpArI                             | −0.09 (−0.43 to 0.25)     | .58  | 0.22 (−0.16 to 0.61)      | .24 |
| SpArI <sub>NREM</sub>             | −0.1 (−0.44 to 0.24)      | .56  | 0.20 (−0.19 to 0.58)      | .30 |
| SpArI <sub>REM</sub> <sup>#</sup> | −0.03 (−0.38 to 0.33)     | .88  | 0.09 (−0.34 to 0.52)      | .68 |
| RarI                              | −0.21 (−0.56 to 0.14)     | .23  | −0.09 (−0.49 to 0.31)     | .65 |
| RArI <sub>NREM</sub>              | −0.21 (−0.56 to 0.14)     | .23  | −0.11 (−0.51 to 0.29)     | .58 |
| RArI <sub>REM</sub> <sup>#</sup>  | −0.28 (−0.61 to 0.05)     | .09  | 0.19 (−0.24 to 0.61)      | .37 |

SpO<sub>2</sub>: peripheral arterial oxygen saturation measured by pulse oximetry; ODI-3%: oxygen desaturation index ≥ 3%; AHI: apnea–hypopnea index; AI: apnea index; AI<sub>NREM</sub>: apnea index in the nonrapid eye movement stage; AI<sub>REM</sub>: apnea index in the rapid eye movement stage; HI: hypopnea index; HI<sub>NREM</sub>: hypopnea index in the nonrapid eye movement stage; HI<sub>REM</sub>: hypopnea index in the rapid eye movement stage; ArI: arousal index; ArI<sub>NREM</sub>: arousal index in the nonrapid eye movement stage; ArI<sub>REM</sub>: arousal index in the rapid eye movement stage; SpArI: spontaneous arousal index; SpArI<sub>NREM</sub>: spontaneous arousal index in the nonrapid eye movement stage; SpArI<sub>REM</sub>: spontaneous arousal index in the rapid eye movement stage; RArI: respiratory arousal index; RArI<sub>NREM</sub>: respiratory arousal index in the nonrapid eye movement stage; RArI<sub>REM</sub>: respiratory arousal index in the rapid eye movement stage.

<sup>#</sup>Two female participants with mild cognitive impairment did not have a REM stage during the polysomnography. Multivariable linear regression models were adjusted for age, body mass index, and education years.

**Table S4.** Associations (odd ratios; ORs) of arousal indices between the participants with and without mild cognitive impairment in different sexes.

| Arousal variable (events/h)            | Crude OR (95% CI) <sup>a</sup> | Model-1 (95% CI) <sup>b</sup> | Model-2 (95% CI) <sup>c</sup> |
|----------------------------------------|--------------------------------|-------------------------------|-------------------------------|
| Male (n = 38, non-MCI = 20, MCI = 18)  |                                |                               |                               |
| ArI                                    | 1.06 (0.98 to 1.15)            | 1.07 (0.99 to 1.17)           | 1.16 (1.02 to 1.33) *         |
| ArI <sub>NREM</sub>                    | 1.06 (0.99 to 1.13)            | 1.07 (0.99 to 1.15)           | 1.13 (1.02 to 1.27) *         |
| ArI <sub>REM</sub>                     | 1.0 (0.97 to 1.04)             | 1.01 (0.97 to 1.05)           | 1.02 (0.98 to 1.07)           |
| SpArI                                  | 1.26 (1.07 to 1.48) *          | 1.29 (1.08 to 1.53) **        | 1.39 (1.1 to 1.75) **         |
| SpArI <sub>NREM</sub>                  | 1.26 (1.07 to 1.47) *          | 1.29 (1.08 to 1.53) **        | 1.37 (1.1 to 1.71) **         |
| SpArI <sub>REM</sub>                   | 1.04 (0.97 to 1.12)            | 1.05 (0.97 to 1.14)           | 1.05 (0.97 to 1.14)           |
| RarI                                   | 0.97 (0.9 to 1.04)             | 0.97 (0.9 to 1.04)            | 1.0 (0.88 to 1.14)            |
| RArI <sub>NREM</sub>                   | 0.97 (0.91 to 1.04)            | 0.97 (0.91 to 1.04)           | 1.0 (0.89 to 1.13)            |
| RArI <sub>REM</sub>                    | 0.99 (0.95 to 1.04)            | 1.0 (0.95 to 1.04)            | 1.02 (0.96 to 1.09)           |
| Female (n =30, non-MCI = 11, MCI = 19) |                                |                               |                               |
| ArI                                    | 1.04 (0.95 to 1.14)            | 1.05 (0.95 to 1.15)           | 0.94 (0.83 to 1.07)           |
| ArI <sub>NREM</sub>                    | 1.05 (0.96 to 1.15)            | 1.05 (0.96 to 1.15)           | 0.94 (0.82 to 1.07)           |
| ArI <sub>REM</sub> <sup>#</sup>        | 0.99 (0.95 to 1.02)            | 0.98 (0.95 to 1.02)           | 0.99 (0.95 to 1.03)           |
| SpArI                                  | 0.94 (0.80 to 1.10)            | 0.94 (0.81 to 1.10)           | 0.91 (0.77 to 1.09)           |
| SpArI <sub>NREM</sub>                  | 0.94 (0.81 to 1.10)            | 0.95 (0.81 to 1.10)           | 0.91 (0.77 to 1.09)           |
| SpArI <sub>REM</sub> <sup>#</sup>      | 1.07 (0.96 to 1.19)            | 1.07 (0.95 to 1.19)           | 1.09 (0.97 to 1.22)           |
| RarI                                   | 1.22 (0.97 to 1.55)            | 1.25 (0.97 to 1.61)           | 0.90 (0.62 to 1.33)           |
| RArI <sub>NREM</sub>                   | 1.22 (0.97 to 1.55)            | 1.25 (0.98 to 1.60)           | 0.90 (0.60 to 1.35)           |
| RArI <sub>REM</sub> <sup>#</sup>       | 0.99 (0.92 to 1.06)            | 0.99 (0.92 to 1.07)           | 0.95 (0.86 to 1.05)           |

CI: confidence interval; ArI: arousal index; ArI<sub>NREM</sub>: arousal index in the nonrapid eye movement stage; ArI<sub>REM</sub>: arousal index in the rapid eye movement stage; SpArI: spontaneous arousal index; SpArI<sub>NREM</sub>: spontaneous arousal index in the nonrapid eye movement stage; SpArI<sub>REM</sub>: spontaneous arousal index in the rapid eye movement stage; RArI: respiratory arousal index; RArI<sub>NREM</sub>: respiratory arousal index in the nonrapid eye movement stage; RArI<sub>REM</sub>: respiratory arousal index in the rapid eye movement stage.

<sup>#</sup> Two female participants with MCI did not have a REM stage during the polysomnography.

<sup>a</sup> Simple logistic regression models.

<sup>b</sup> Model-1: adjusted for age and body mass index

<sup>c</sup> Model-2: adjusted for age, body mass index, and ODI-3%

\* $p < .05$ ; \*\* $p < .01$ .



**Table S5.** Demographic characteristics of participants stratified by Clinical Dementia Rating score in the dataset that excluded participants without rapid eye movement sleep

| <b>Categorical variable</b>           | <b>non-MCI group (n = 31)</b> | <b>MCI group (n = 35)</b> | <b>P</b> |
|---------------------------------------|-------------------------------|---------------------------|----------|
| Age (yr) <sup>a</sup>                 | 68.19 ± 7.35                  | 69.77 ± 7.92              | .18      |
| Sex (male/female) <sup>b</sup>        | 20/11                         | 18/17                     | .28      |
| BMI (kg/m <sup>2</sup> ) <sup>a</sup> | 24.16 ± 2.84                  | 23.32 ± 4.05              | .34      |
| Neck circumference (cm) <sup>a</sup>  | 36.13 ± 3.23                  | 35.09 ± 3.17              | .19      |
| Waist circumference (cm) <sup>a</sup> | 86.51 ± 9.63                  | 85.43 ± 10.55             | .67      |
| Education (years)                     | 9.94 ± 4.70                   | 9.71 ± 4.11               | .36      |
| CASI score <sup>c</sup>               | 87.58 ± 7.02                  | 79.43 ± 12.61             | <.01     |
| Long-term memory                      | 9.77 ± 0.56                   | 9.54 ± 1.36               | .48      |
| Short-term memory                     | 10.16 ± 2.31                  | 7.09 ± 3.34               | <.01     |
| Attention                             | 6.61 ± 1.28                   | 6.09 ± 1.29               | .05      |
| Concentration                         | 7.90 ± 2.01                   | 7.51 ± 2.63               | .40      |
| Orientation                           | 17.00 ± 1.77                  | 15.6 ± 3.52               | <.05     |
| Abstraction and judgment              | 9.26 ± 1.69                   | 8.69 ± 1.95               | .12      |
| Language abilities                    | 9.58 ± 0.81                   | 9.34 ± 1.28               | .24      |
| Visual construction                   | 9.97 ± 0.18                   | 9.29 ± 1.41               | <.01     |
| Category fluency                      | 7.00 ± 2.13                   | 6.31 ± 2.43               | .30      |
| OSAS severity <sup>b</sup>            |                               |                           | .90      |
| Normal, n (%)                         | 4 (12.90%)                    | 4 (11.43%)                |          |
| Mild, n (%)                           | 6 (19.35%)                    | 9 (25.71%)                |          |
| Moderate, n (%)                       | 9 (29.03%)                    | 11 (31.43%)               |          |
| Severe, n (%)                         | 12 (38.71%)                   | 11 (31.43%)               |          |

MCI: mild cognitive impairment; BMI: body mass index; CASI: Cognitive Abilities Screening Instrument; OSAS: obstructive sleep apnea syndrome.

Data are expressed as mean ± standard deviation.

a Differences between groups were assessed using Student's *t* test.

b Differences between groups were assessed using the chi-squared test.

c Differences between groups were assessed using the Mann–Whitney *U* test.

**Table S6.** Comparison of sleep parameters between participants with and without mild cognitive impairment (MCI) in the dataset that excluded participants without rapid eye movement (REM) sleep

| <b>Categorical variable</b>            | <b>non-MCI group (n = 31)</b> | <b>MCI group (n = 35)</b> | <b>P</b> |
|----------------------------------------|-------------------------------|---------------------------|----------|
| <b>Sleep architecture</b>              |                               |                           |          |
| Sleep efficiency (%)                   | 72.20 ± 12.19                 | 69.57 ± 18.76             | .46      |
| Wake (% of SPT)                        | 22.63 ± 11.77                 | 25.29 ± 16.84             | .43      |
| NREM (% of SPT)                        | 69.30 ± 10.98                 | 65.05 ± 15.16             | .21      |
| REM (% of SPT)                         | 8.09 ± 6.15                   | 9.67 ± 5.08               | .26      |
| WASO (min)                             | 76.24 ± 38.55                 | 83.3 ± 53.48              | .50      |
| TST (min)                              | 261.69 ± 45.37                | 253.33 ± 67.35            | .49      |
| <b>Oximetry parameter</b>              |                               |                           |          |
| Mean SpO <sub>2</sub> (%)              | 95.41 ± 1.69                  | 95.85 ± 1.38              | .25      |
| Minimum SpO <sub>2</sub> (%)           | 83.55 ± 7.72                  | 85.11 ± 7.93              | .09      |
| ODI-3% (events/h)                      | 23.55 ± 16.76                 | 21.88 ± 15.45             | .40      |
| <b>Sleep disorder index (events/h)</b> |                               |                           |          |
| AHI                                    | 24.61 ± 17.53                 | 22.86 ± 16.39             | .38      |
| AI                                     | 3.25 ± 3.88                   | 6.15 ± 10.91              | .41      |
| AI <sub>NREM</sub>                     | 2.84 ± 3.46                   | 6.12 ± 11.38              | .37      |
| AI <sub>REM</sub>                      | 6.40 ± 11.99                  | 6.27 ± 11.62              | .33      |
| HI                                     | 21.35 ± 16.87                 | 16.71 ± 13.09             | .18      |
| HI <sub>NREM</sub>                     | 21.13 ± 17.65                 | 16.13 ± 13.47             | .19      |
| HI <sub>REM</sub>                      | 22.97 ± 20.96                 | 22.04 ± 19.19             | .45      |

SPT: sleep period of time; NREM: nonrapid eye movement; REM: rapid eye movement; WASO: wake time after sleep onset; TST: total sleep time; SpO<sub>2</sub>: peripheral arterial oxygen saturation measured by pulse oximetry; ODI-3%: oxygen desaturation index ≥ 3%; AHI: apnea–hypopnea index; AI: apnea index; AI<sub>NREM</sub>: apnea index in the nonrapid eye movement stage; AI<sub>REM</sub>: apnea index in the rapid eye movement stage; HI: hypopnea index; HI<sub>NREM</sub>: hypopnea index in the nonrapid eye movement stage; HI<sub>REM</sub>: hypopnea index in the rapid eye movement stage.

Data are expressed as mean ± standard deviation.

Differences between groups were assessed using the Mann–Whitney *U* test.

**Table S7.** Comparison of arousal indices between participants with and without mild cognitive impairment (MCI) in the dataset that excluded participants without rapid eye movement (REM) sleep

| Arousal variable (events/h) | non-MCI group (n = 31) | MCI group (n = 35) | <i>P</i> |
|-----------------------------|------------------------|--------------------|----------|
| ArI                         | 20.26 ± 9.66           | 22.99 ± 8.31       | .05      |
| ArI <sub>NREM</sub>         | 20.30 ± 10.40          | 23.75 ± 9.11       | <.05     |
| ArI <sub>REM</sub>          | 23.23 ± 25.48          | 19.97 ± 16.88      | .45      |
| SpArI                       | 8.43 ± 4.48            | 12.36 ± 7.25       | <.05     |
| SpArI <sub>NREM</sub>       | 8.56 ± 4.70            | 12.92 ± 8.0        | <.01     |
| SpArI <sub>REM</sub>        | 6.35 ± 7.13            | 10.18 ± 10.89      | .07      |
| RArI                        | 12.05 ± 10.8           | 11.22 ± 9.38       | .42      |
| RArI <sub>NREM</sub>        | 11.85 ± 11.22          | 11.29 ± 9.84       | .49      |
| RArI <sub>REM</sub>         | 14.69 ± 18.99          | 11.31 ± 14.63      | .36      |
| SnArI                       | 0.3 ± 0.9              | 0.1 ± 0.32         | .36      |
| SnArI <sub>NREM</sub>       | 0.23 ± 0.78            | 0.1 ± 0.35         | .14      |
| SnArI <sub>EM</sub>         | 1.06 ± 3.67            | 0.08 ± 0.34        | .41      |
| LArI                        | 1.32 ± 1.29            | 1.57 ± 1.43        | .28      |
| LArI <sub>NREM</sub>        | 1.35 ± 1.4             | 1.68 ± 1.62        | .22      |
| LArI <sub>REM</sub>         | 4.69 ± 21.46           | 0.58 ± 1.31        | .22      |

ArI: arousal index; ArI<sub>NREM</sub>: arousal index in the nonrapid eye movement stage; ArI<sub>REM</sub>: arousal index in the rapid eye movement stage; SpArI: spontaneous arousal index; SpArI<sub>NREM</sub>: spontaneous arousal index in the nonrapid eye movement stage; SpArI<sub>REM</sub>: spontaneous arousal index in the rapid eye movement stage; RArI: respiratory arousal index; RArI<sub>NREM</sub>: respiratory arousal index in the nonrapid eye movement stage; RArI<sub>REM</sub>: respiratory arousal index in the rapid eye movement stage; SnArI: snore arousal index; SnArI<sub>NREM</sub>: snore arousal index in the nonrapid eye movement stage; SnArI<sub>REM</sub>: snore arousal index in the rapid eye movement stage; LArI: limb movement arousal index; LArI<sub>NREM</sub>: limb movement arousal index in the nonrapid eye movement stage; LArI<sub>REM</sub>: limb movement arousal index in the rapid eye movement stage.

Data are expressed as mean ± standard deviation.

Differences between groups were all assessed using the Mann–Whitney *U* test.



**Table S8.** Associations between sleep parameters and Cognitive Abilities Screening Instrument score in the dataset that excluded participants without rapid eye movement sleep (non-mild cognitive impairment [non-MCI] group: n = 31; MCI group: n = 35)

| Categorical variable            | Beta coefficient (95% CI) | P    |
|---------------------------------|---------------------------|------|
| Oximetry parameter              |                           |      |
| Mean SpO <sub>2</sub> (%)       | 0.04 (−0.22 to 0.29)      | .77  |
| Minimum SpO <sub>2</sub> (%)    | 0.31 (0.07 to 0.56)       | <.05 |
| ODI-3% (events/h)               | −0.34 (−0.59 to −0.09)    | <.01 |
| Sleep disorder index (events/h) |                           |      |
| AHI                             | −0.34 (−0.59 to −0.09)    | <.01 |
| AI                              | −0.19 (−0.43 to 0.06)     | .13  |
| AI <sub>NREM</sub>              | −0.21 (−0.45 to 0.04)     | .09  |
| AI <sub>REM</sub>               | −0.03 (−0.27 to 0.21)     | .79  |
| HI                              | −0.26 (−0.51 to −0.01)    | <.05 |
| HI <sub>NREM</sub>              | −0.26 (−0.51 to −0.01)    | <.05 |
| HI <sub>REM</sub>               | −0.15 (−0.4 to 0.1)       | .23  |
| Arousal variable (events/h)     |                           |      |
| ArI                             | −0.22 (−0.48 to 0.05)     | .11  |
| ArI <sub>NREM</sub>             | −0.23 (−0.49 to 0.03)     | .09  |
| ArI <sub>REM</sub>              | −0.0 (−0.25 to 0.24)      | .99  |
| SpArI                           | −0.02 (−0.27 to 0.22)     | .84  |
| SpArI <sub>NREM</sub>           | −0.04 (−0.28 to 0.21)     | .77  |
| SpArI <sub>REM</sub>            | −0.0 (−0.25 to 0.24)      | .97  |
| RarI                            | −0.2 (−0.46 to 0.07)      | .14  |
| RAR <sub>NREM</sub>             | −0.2 (−0.47 to 0.06)      | .13  |
| RAR <sub>REM</sub>              | −0.14 (−0.39 to 0.11)     | .28  |

SpO<sub>2</sub>: peripheral arterial oxygen saturation measured by pulse oximetry; ODI-3%: oxygen desaturation index  $\geq 3\%$ ; AHI: apnea–hypopnea index; AI: apnea index; AI<sub>NREM</sub>: apnea index in the nonrapid eye movement stage; AI<sub>REM</sub>: apnea index in the rapid eye movement stage; HI: hypopnea index; HI<sub>NREM</sub>: hypopnea index in the nonrapid eye movement stage; HI<sub>REM</sub>: hypopnea index in the rapid eye movement stage; ArI: arousal index; ArI<sub>NREM</sub>: arousal index in the nonrapid eye movement stage; ArI<sub>REM</sub>: arousal index in the rapid eye movement stage; SpArI: spontaneous arousal index; SpArI<sub>NREM</sub>: spontaneous arousal index in the nonrapid eye movement stage; SpArI<sub>REM</sub>: spontaneous arousal index in the rapid eye movement stage; RArI: respiratory arousal index; RArI<sub>NREM</sub>: respiratory arousal index in the nonrapid eye movement stage; RArI<sub>REM</sub>: respiratory arousal index in the rapid eye movement stage. Multivariable linear regression models were adjusted for age, sex, body mass index, and education years.



**Table S9.** Associations (odd ratios [ORs]) of arousal indices between participants with and without mild cognitive impairment (MCI) in the dataset that excluded participants without rapid eye movement (REM) sleep (non-MCI group: n = 31; MCI group: n = 35)

| <b>Arousal variable (arousals/h)</b> | <b>Crude OR (95% CI)<sup>a</sup></b> | <b>Model-1 (95% CI)<sup>b</sup></b> | <b>Model-2 (95% CI)<sup>c</sup></b> |
|--------------------------------------|--------------------------------------|-------------------------------------|-------------------------------------|
| ArI                                  | 1.04 (0.98-1.10)                     | 1.07 (1.00-1.14)                    | 1.09 (1.00-1.18)                    |
| ArI <sub>NREM</sub>                  | 1.04 (0.99-1.10)                     | 1.07 (1.00-1.13)                    | 1.09 (1.01-1.17)                    |
| ArI <sub>REM</sub>                   | 0.99 (0.97-1.02)                     | 0.99 (0.97-1.02)                    | 0.99 (0.97-1.02)                    |
| SpArI                                | 1.13 (1.02-1.26) *                   | 1.14 (1.03-1.27) *                  | 1.19 (1.05-1.35) **                 |
| SpArI <sub>NREM</sub>                | 1.13 (1.03-1.25) *                   | 1.15 (1.04-1.28) *                  | 1.18 (1.05-1.34) **                 |
| SpArI <sub>REM</sub>                 | 1.05 (0.99-1.11)                     | 1.06 (0.99-1.12)                    | 1.06 (0.99-1.13)                    |
| RarI                                 | 0.98 (0.92 to 1.04)                  | 0.99 (0.93 to 1.06)                 | 0.97 (0.86 to 1.09)                 |
| RAR <sub>NREM</sub>                  | 0.98 (0.93 to 1.04)                  | 1.01 (0.94 to 1.06)                 | 0.98 (0.88 to 1.09)                 |
| RAR <sub>REM</sub>                   | 0.99 (0.95 to 1.03)                  | 1.00 (0.96 to 1.04)                 | 0.99 (0.95 to 1.04)                 |

CI: confidence interval; ArI: arousal index; ArI<sub>NREM</sub>: arousal index in the nonrapid eye movement stage; ArI<sub>REM</sub>: arousal index in the rapid eye movement stage; SpArI: spontaneous arousal index; SpArI<sub>NREM</sub>: spontaneous arousal index in the nonrapid eye movement stage; SpArI<sub>REM</sub>: spontaneous arousal index in the rapid eye movement stage; RArI: respiratory arousal index; RArI<sub>NREM</sub>: respiratory arousal index in the nonrapid eye movement stage; RArI<sub>REM</sub>: respiratory arousal index in the rapid eye movement stage.

<sup>a</sup> Simple logistic regression models.

<sup>b</sup> Model-1: adjusted for age, sex, body mass index

<sup>c</sup> Model-2: adjusted for age, sex, body mass index, and ODI-3%

\* $p < .05$ ; \*\* $p < .01$ .
